# Supplementary material for: A LC-QTOF Method for the Determination of PEGDE Residues in Dermal Fillers
Source: MDPI journal article supplement (doi:10.3390/gels9050409), 2023-05-13

# A LC-QTOF Method for the Determination of PEGDE Residues in Dermal Fillers

Giuseppe Alonci <sup>1,\*</sup>, Anna Boussard <sup>1</sup>, Martina Savona <sup>1</sup>, Fabiana Cordella <sup>2</sup>, Gaetano Angelici <sup>2</sup>, Roberto Mocchi <sup>3</sup>, Sabrina Sommatì <sup>3</sup> and Damiano Monticelli <sup>4</sup>

## S1. PEGDE qualification method details

The HPLC-QTOF measures were performed on an Agilent 1260 Infinity II HPLC system coupled to an Agilent 6530 Q-TOF mass spectrometer. Chromatographic separation was performed using Agilent InfinityLab Poroshell 120EC C18 column (150 x 3.0 mm, 2.7µm).

**Table S1.** HPLC-QTOF method details for qualification of PEGDE reference material.

| LC                                                                           |              |  |  |  |
|------------------------------------------------------------------------------|--------------|--|--|--|
| Gradient                                                                     |              |  |  |  |
|                                                                              |              |  |  |  |
|                                                                              |              |  |  |  |
|                                                                              |              |  |  |  |
|                                                                              |              |  |  |  |
|                                                                              |              |  |  |  |
|                                                                              |              |  |  |  |
|                                                                              |              |  |  |  |
| * A = 70% ACN+30% H <sub>2</sub> O /10 mM Ammonium Formate +0.1% Formic acid |              |  |  |  |
| ** B = H <sub>2</sub> O + 10 mM Ammonium Formate + 0.1% Formic Acid          |              |  |  |  |
| Stoptime                                                                     | 13 minutes   |  |  |  |
| Temperature                                                                  | 5 °C         |  |  |  |
| Injection Volume                                                             | 5 µL         |  |  |  |
| Flow                                                                         | 0.600 mL/min |  |  |  |
| Q-TOF                                                                        |              |  |  |  |
| Drying gas                                                                   | 8 L/min      |  |  |  |
| Fragmentor                                                                   | 150 V        |  |  |  |
| Vcap                                                                         | 3500 V       |  |  |  |
| Ion polarity                                                                 | Positive     |  |  |  |

|                         |             |
|-------------------------|-------------|
| <b>Mass range (m/z)</b> | 100-1000    |
| <b>Acquisition Rate</b> | 2 spectra/s |

## S2. PEGDE quantification method details

The HPLC-QTOF measures were performed on an Agilent 1260 Infinity II HPLC system coupled to an Agilent 6530 Q-TOF mass spectrometer. Chromatographic separation was performed using Agilent InfinityLab Poroshell 120EC C18 column (150 x 3.0 mm, 2.7 $\mu$ m).

Before the starting of the measurements, the system tuning was performed with undiluted ESI-L Tune/Calibration mix TOF (G1969-85000) supplied by Agilent Technologies. Ions 121.050873. and 922.009798 were selected as reference ions during the measurements, coming from a reference solution prepared by diluting the G1969-85001 ES-TOF Reference Mass Solution Kit in acetonitrile/water according to Agilent instructions.

**Table S2.** HPLC-QTOF method details for method validation for PEGDE content in HA hydrogels.

| LC                                                                             |               |           |            |                  |
|--------------------------------------------------------------------------------|---------------|-----------|------------|------------------|
| Gradient                                                                       |               |           |            |                  |
|                                                                                | Time<br>(min) | A*<br>(%) | B**<br>(%) | Flow<br>(mL/min) |
|                                                                                | 0.00          | 5.0       | 95.0       | 0.600            |
|                                                                                | 1.00          | 5.0       | 95.0       | 0.600            |
|                                                                                | 6.00          | 65.0      | 35.0       | 0.600            |
|                                                                                | 7.00          | 65.0      | 35.0       | 0.600            |
|                                                                                | 8.00          | 100.0     | 0          | 0.600            |
|                                                                                | 9.00          | 100.0     | 0          | 0.600            |
|                                                                                | 10.00         | 5.0       | 95.0       | 0.600            |
| * A = 70% ACN+30% H <sub>2</sub> O /5 mM Ammonium Formate<br>+0.1% Formic acid |               |           |            |                  |
| ** B = H <sub>2</sub> O + 5 mM Ammonium Formate + 0.1% Formic Acid             |               |           |            |                  |
| Stoptime                                                                       | 13 minutes    |           |            |                  |
| Temperature                                                                    | 5 °C          |           |            |                  |
| Injection Volume                                                               | 5 µL          |           |            |                  |
| Flow                                                                           | 0.600 mL/min  |           |            |                  |
| Q-TOF                                                                          |               |           |            |                  |
| Drying gas                                                                     | 8 L/min       |           |            |                  |
| Fragmentor                                                                     | 150 V         |           |            |                  |
| Vcap                                                                           | 3500 V        |           |            |                  |
| Ion polarity                                                                   | Positive      |           |            |                  |
| Mass range (m/z)                                                               | 100-1000      |           |            |                  |

|                         |             |
|-------------------------|-------------|
| <b>Acquisition Rate</b> | 2 spectra/s |
|-------------------------|-------------|

26

*S3. PEGDE Certificate of Analysis*

27

7074, nC

BOC Sciences®

W: www.bocsci.com

T: 1-631-594-8993

F: 1-631-614-7826

E: info@vocsci.com

## Certificate of Analysis

## (Poly(ethylene glycol) diglycidyl ether, Mn=500

|                            |                                                          |                  |           |
|----------------------------|----------------------------------------------------------|------------------|-----------|
| CAS No.                    | 72207-80-8                                               | Batch No.        | B20U06043 |
| Synonyms                   | $\alpha,\omega$ -Diglycidyl poly (ethylene glycol) - 500 | Packing Quantity | 10 g      |
| TESTING ITEM               | SPECIFICATION                                            | RESULT           |           |
| Appearance                 | Colorless to yellowish liquid                            | Yellowish liquid |           |
| Color                      | $\leq 4$                                                 | Conforms         |           |
| Identity (HNMR) *          | Conforms to structure                                    | Conforms         |           |
| Substitution (HPLC) *      | $\geq 93.0\%$                                            | 99.0%            |           |
| Average molecular weight * | 500 $\pm$ 50 Da                                          | 534 Da           |           |
| Moisture (K.F.) *          | $\leq 2.0\%$                                             | 0.01%            |           |
| Residual solvents *        | Dichloromethane $\leq 600$ ppm                           | 50 ppm           |           |
|                            | Tetrahydrofuran $\leq 720$ ppm                           | 50 ppm           |           |
|                            | Toluene $\leq 890$ ppm                                   | 50 ppm           |           |
|                            | n-Heptane $\leq 5000$ ppm                                | 50 ppm           |           |
| Endotoxins *               | $\leq 0.1$ EU/mg                                         | 0.1 EU/mg        |           |
| Conclusion                 | The product complies with the given specifications.      |                  |           |
| Storage                    | - 20 °C                                                  |                  |           |

QC:

Approved by:

Date:

Harry Garrett

Zoe Tseng

June 28, 2020

BOC Sciences products are to be used for research purposes only. They may not be used for any other purpose, including, but not limited to, use in drugs, in vitro diagnostic purposes, therapeutics, or in humans unless an exception stated on the label or certificate. This document is not intended to assure certain properties of products or their suitability for a specific application.

BOCSCI Inc., 45-16 Ramsey Road, Shirley, NY 11967, USA

**Figure S1.** Py-GC-MS mass spectra comparison of (a) the peak at RT= 21.75 in the first shot and (b) the peak at RT=21.43 min in the second shot.

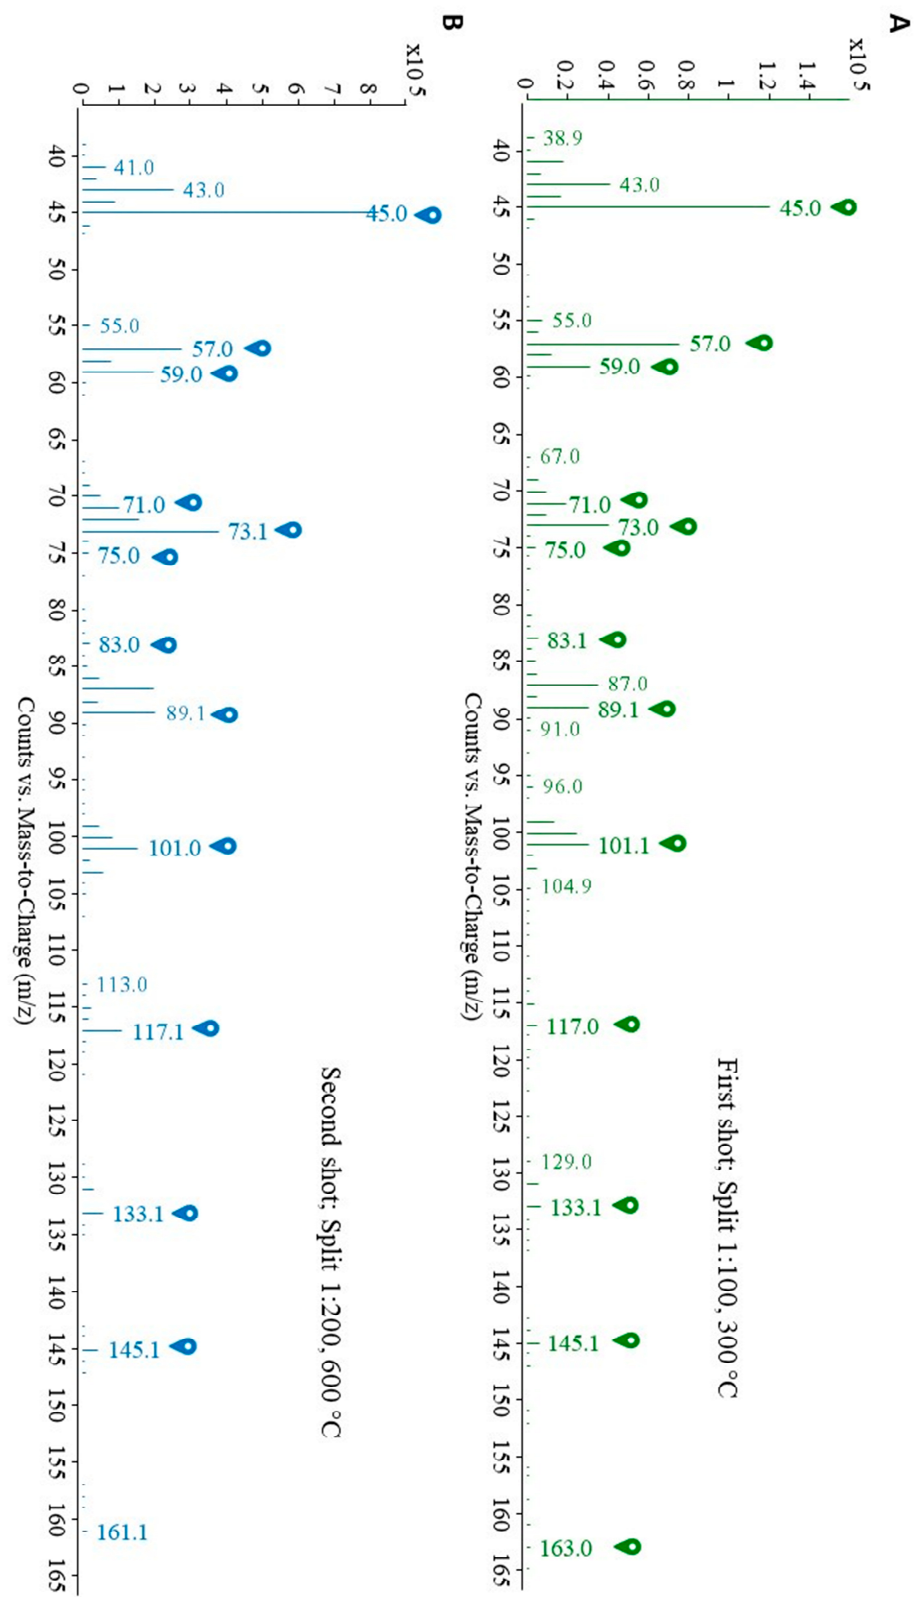

**Figure S2.** Fragment identification in Py-GC-MS mass spectra of the peak at RT= 21.75 in the first shot.

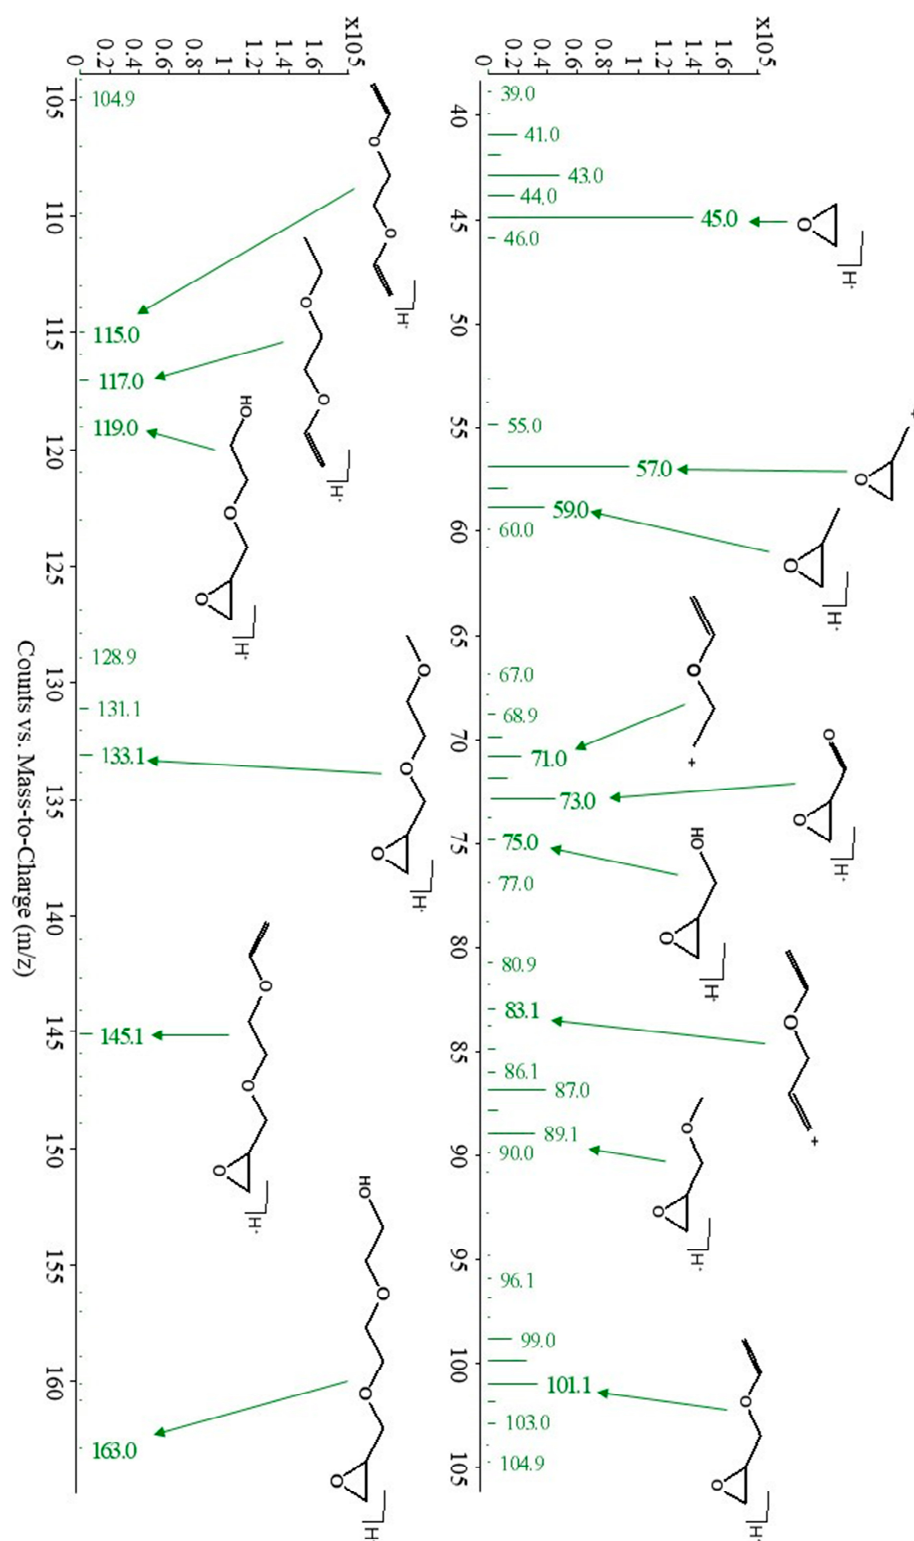

**Figure S3.** PEGDE fragmentation.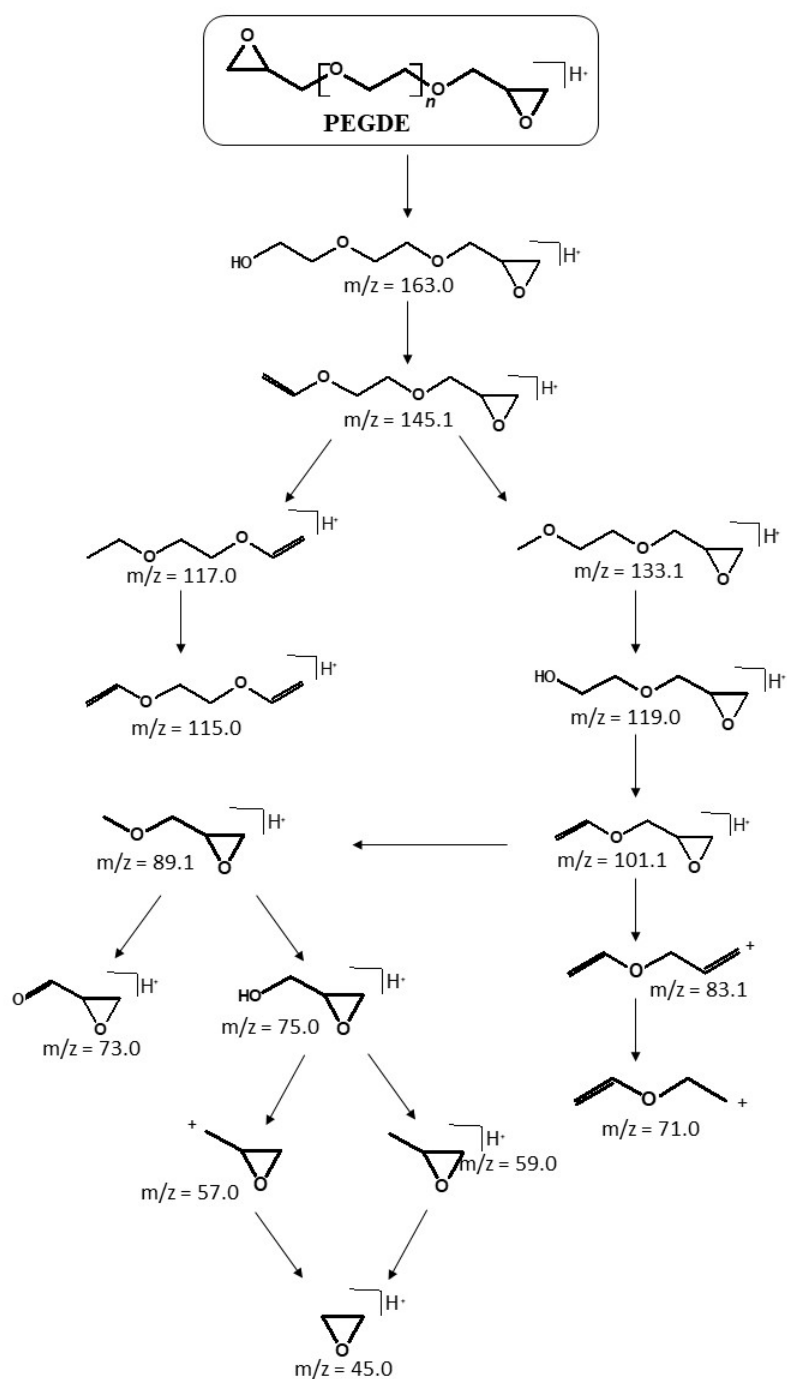

Supplement: s1 [file s1]
